# Supplementary material for: A marine-derived small molecule induces immunogenic cell death against triple-negative breast cancer through ER stress-CHOP pathway
Source: Int J Biol Sci. 2022 Apr 11;18(7):2898–913. doi: 10.7150/ijbs.70975 (PMC9066120; doi:10.7150/ijbs.70975)
Supplement: Supplementary file 1 — Supplementary figures and table. [file ijbsv18p2898s1.pdf]

**Methods:****1. SUPPLEMENTARY TABLES****Table S1. Primer information of qRT-PCR**

| <b>Table1 Primer information of qRT-PCR</b> |                     |                      |               |
|---------------------------------------------|---------------------|----------------------|---------------|
| <b>Gene names</b>                           | <b>Primer names</b> | <b>Sequence</b>      | <b>Length</b> |
| GAPDH                                       | GAPDH-F             | TGGTATCGTGGAAGGACTC  | 19            |
|                                             | GAPDH-R             | GGATGATGTTCTGGAGAGC  | 19            |
| PERK                                        | PERK-F              | TCTTGGTCCCCTGGAAGAG  | 20            |
|                                             | PERK-R              | AAAGCAGTGGGATTTGGATG | 20            |
| ATF3                                        | ATF3-F              | GTGCCGAAACAAGAAGAAGG | 20            |
|                                             | ATF-R               | TCTGAGCCTTCAGTTCAGCA | 20            |
| ATF4                                        | ATF4-F              | GTGTTCTCTGTGGGTCTGCC | 20            |
|                                             | ATF4-R              | GAGCCTCGTTCTTCTTTTCC | 20            |
| DDIT3                                       | DDIT3-F             | GACCCTGCTTCTCTGGCTTG | 20            |
|                                             | DDIT3-R             | CCGTTTCCTGGTTCTCCCTT | 20            |
| BAX                                         | BAX-F               | TCTGACGGCAACTTCAACTG | 20            |
|                                             | BAX-R               | GGGACATCAGTCGCTTCAGT | 20            |
| BCL2                                        | BCL-2-F             | GTGTGTGGAGAGCGTCAACC | 20            |
|                                             | BCL2-R              | AGCCAGGAGAAATCAAACAG | 20            |

**Results:**  
**2 SUPPLEMENTARY FIGURES**  
**Figure S1**

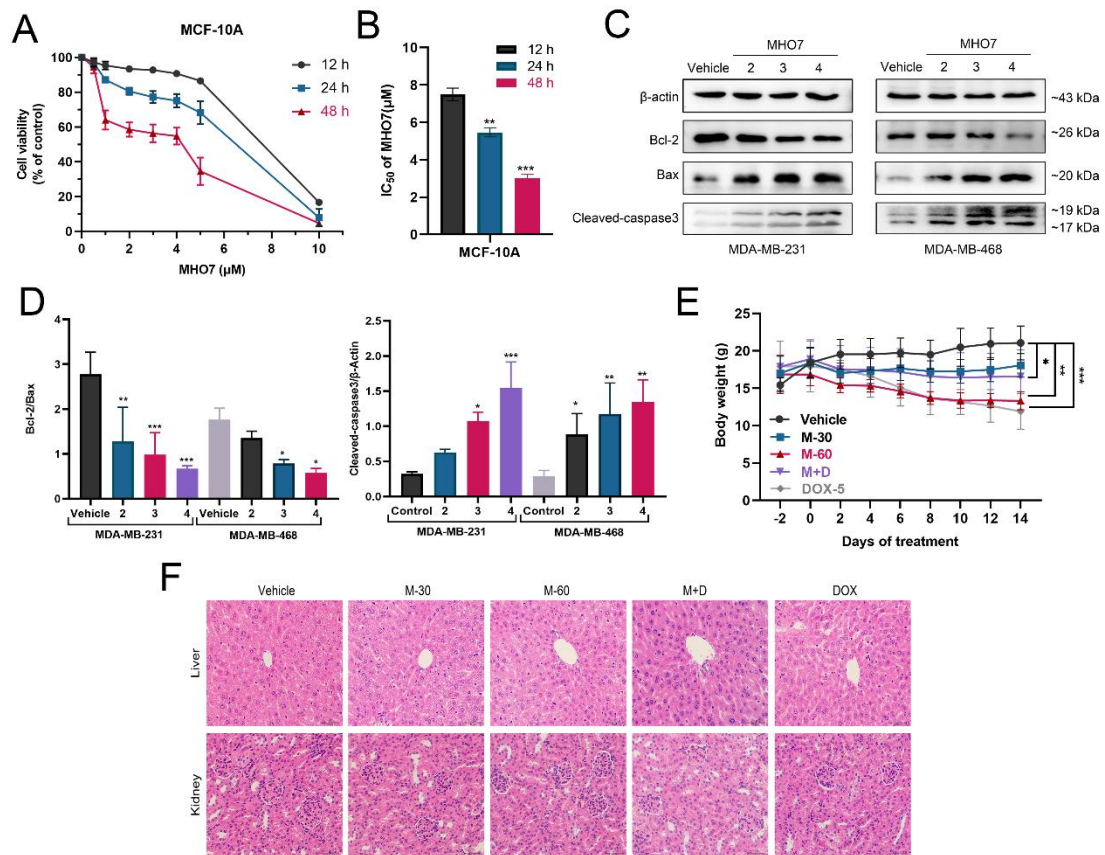

**Figure S1. Antitumor effect of MHO7 *in vitro* and *in vivo*.** (A) The effect of MHO7 on MCF-10A cells at 12, 24, and 48 h. (B) The IC<sub>50</sub> value of MHO7 on MCF-10A at 12, 24, and 48 h. (C-D) The expression of Bcl-2, Bax and cleaved caspase 3 were measured by western blot after the treatment of MHO7. (E) Body weight-time curves were measured in different groups. (F) Liver and kidney tissue in mice were analyzed H&E staining.

**A**

Volcano plot (left) and GO enrichment analysis (right) of differentially expressed genes. The volcano plot shows log<sub>2</sub>(FDR) on the y-axis and log<sub>2</sub>(RC) on the x-axis. The GO enrichment analysis shows the number of genes (Count) and adjusted p-value (p.adjust) for various biological processes.

**B**

Heatmap showing the expression of cell cycle arrest related genes across different samples. The color scale ranges from -1.50 (blue) to 2.00 (red).

**C**

Flow cytometry histograms and bar graphs showing cell cycle distribution. The histograms show DNA content (2N, 4N, 8N) for MDA-MB-231 and MDA-MB-468 cells treated with Vehicle, MHO7, or MHO7 + NAC. The bar graphs show the percentage of cells in G0/G1, S, and G2/M phases.

**D**

Western blot and bar graph showing protein expression. The Western blot shows p-PERK, Bip, β-Tubulin, ATF4, p-eIF2α, and CHOP. The bar graph shows the relative protein expression of these markers.

**Figure S2. RNA-seq analysis revealed the induction of ER stress and cell cycle arrest in MHO7 treated MDA-MB-231 cells. (A)** Volcano Plot and GO enrichment of DEGs were analyzed by RNA-seq. **(B)** Heat map of differentially expressed cell cycle-related genes was analyzed by RNA-seq. **(C)** Cell cycle was detected by flow cytometry after MHO7 treatment. **(D)** The expression of BiP/p-PERK/p-eIF2 $\alpha$ /ATF4/CHOP were measured by western blot under MHO7 treatment in 4T1 cells.

**Figure S3**

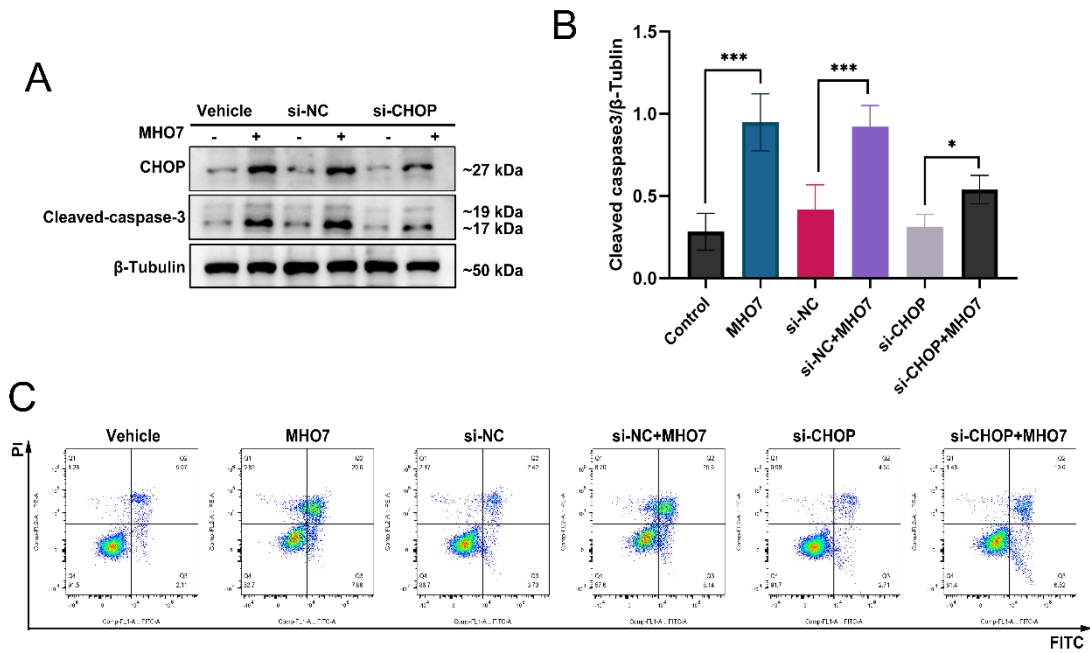

**Figure S3. CHOP contributed to the apoptosis induced by MHO7. (A-B)** CHOP and caspase3 expression measured by western blot in MDA-MB-231 cells after MHO7 (3  $\mu$ M) or si-CHOP treatment. **(C)** The percentages of apoptosis cells were measured by flow cytometry under MHO7 (3  $\mu$ M) or si-CHOP treatment. \* $P < 0.05$ ; \*\* $P < 0.01$ ; \*\*\* $P < 0.001$ ; and\*\*\*\*  $P < 0.0001$ .

**Figure S4**

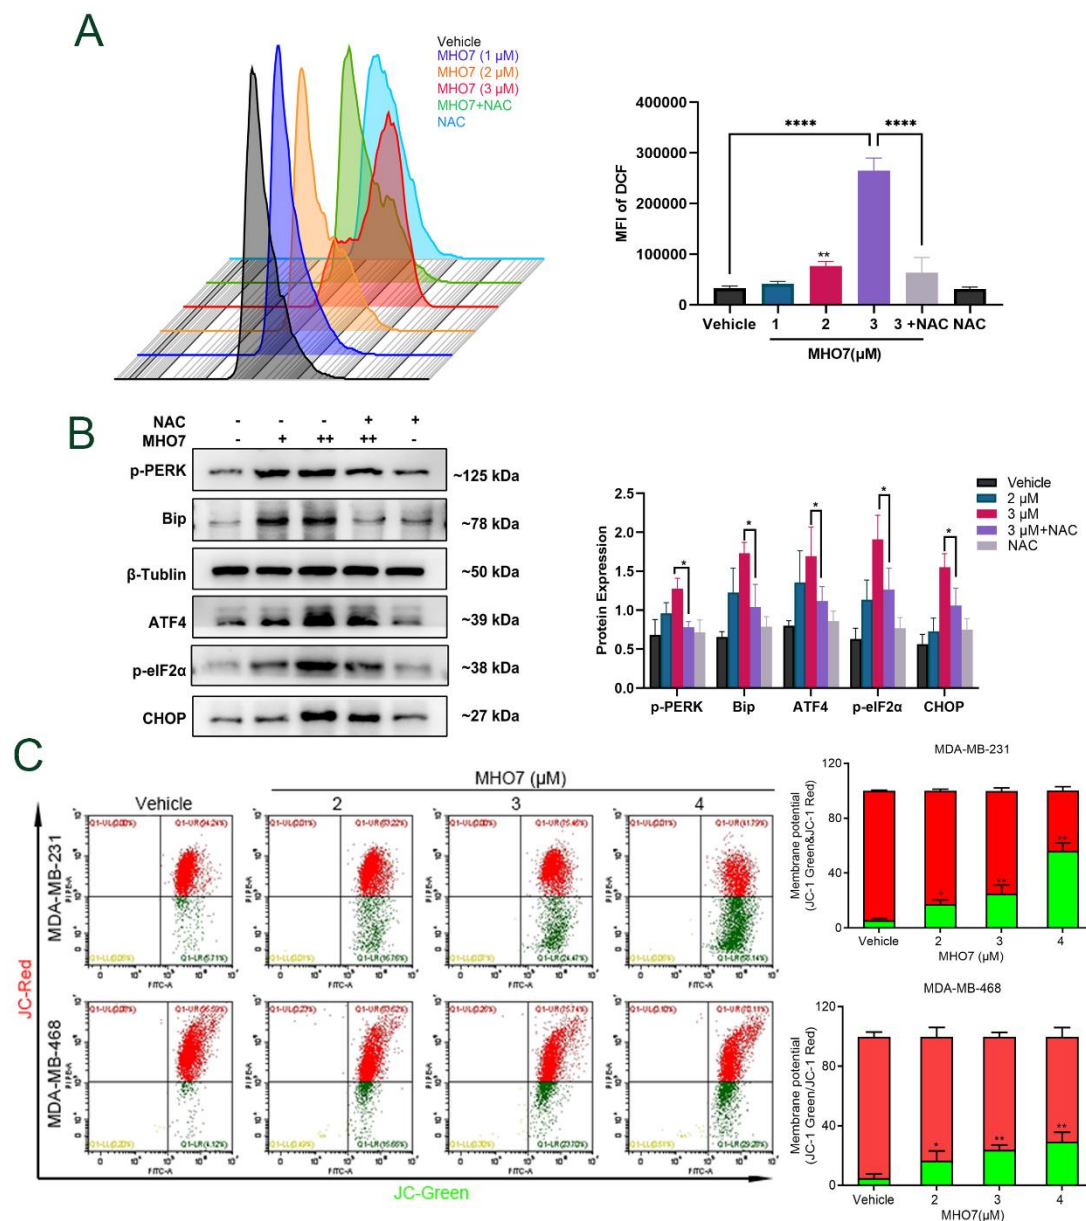

**Figure S4. ROS generation and mitochondrial dysfunction induced by MHO7. (A)** The ROS level was detected by flow cytometry when treated with MHO7 for 24 h or pretreated with NAC (4 mM) for 1 h in 4T1 cells. **(B)** ER stress-related proteins were measured by western blot under the treatment of MHO7 (+: 2  $\mu$ M; ++: 3  $\mu$ M) or pretreated with NAC (4 mM) in 4T1 cells. **(C)** Mitochondrial membrane potentials (MMPs) were detected by flow cytometry after the treatment of MHO7. \* $P < 0.05$ ; \*\* $P < 0.01$ ;

**Figure S5**

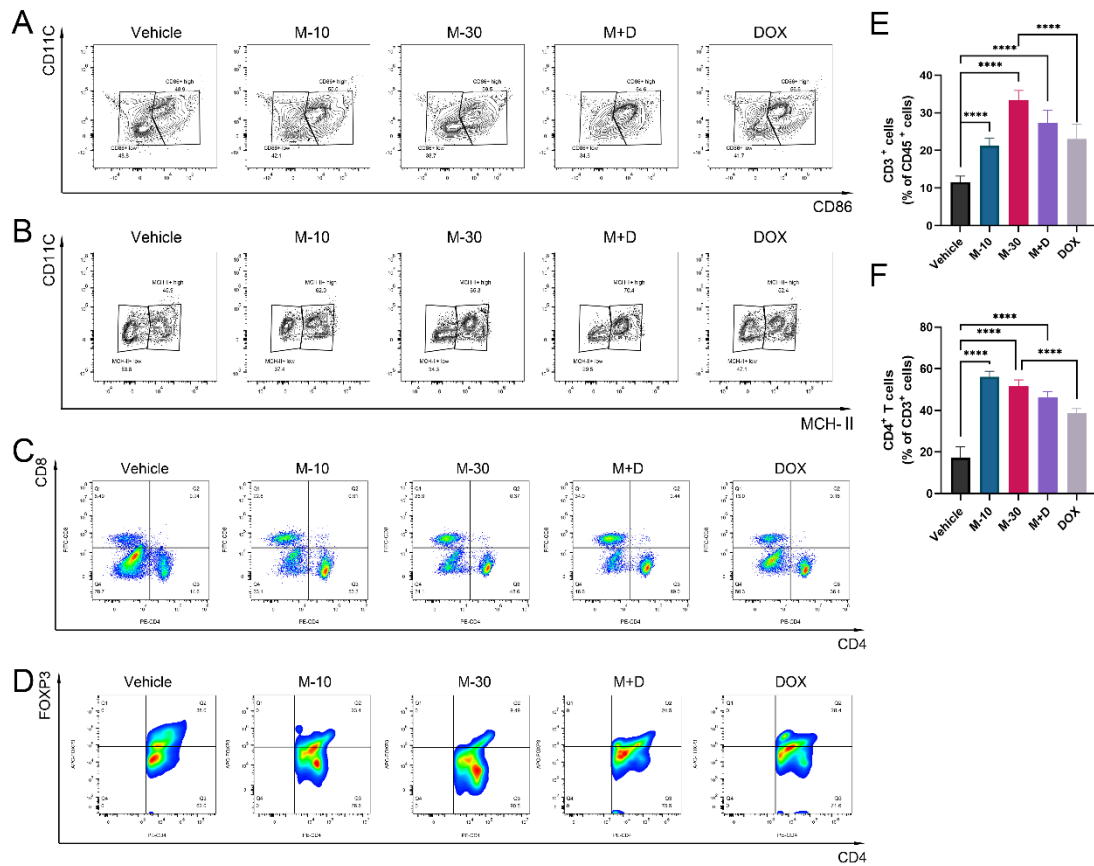

**Figure S5. Maturation status of dendritic cells, activation of T cells and level of Tregs in MHO7 treated mice were analyzed by flow cytometry, respectively. (A)** CD11C<sup>+</sup>/CD86<sup>+</sup> DC cells in spleens were analyzed by flow cytometry. **(B)** CD11C<sup>+</sup>/MHC II DC cells in spleens were analyzed by flow cytometry. **(C)** CD3<sup>+</sup>/CD8<sup>+</sup> T cells in spleens were analyzed by flow cytometry. **(D)** CD4<sup>+</sup>/FOXP3<sup>+</sup> T cells in spleens were analyzed by flow cytometry. **(E)** CD3<sup>+</sup>/CD8<sup>+</sup> T cells in spleens were analyzed by flow cytometry. **(F)** CD3<sup>+</sup>/CD4<sup>+</sup> T cells were analyzed by flow cytometry, in spleens. \**P* < 0.05; \*\**P* < 0.01; \*\*\**P* < 0.001; and\*\*\*\* *P* < 0.0001.

**Figure S6**

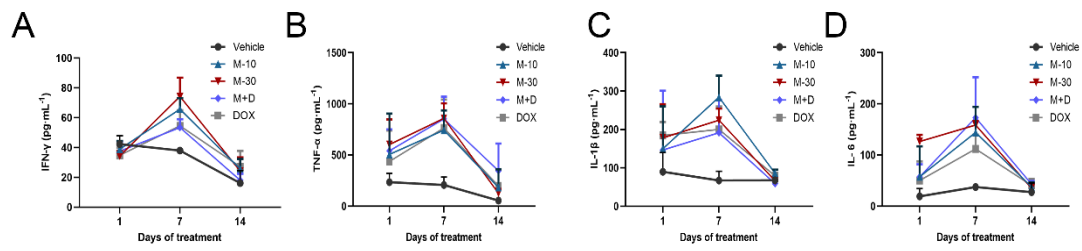

**Figure S6.** Antitumor cytokine levels, including (A) IFN- $\gamma$ , (B) TNF- $\alpha$ , (C) IL-1 $\beta$  and (D) IL-6 in the serum were detected by ELISA from each group on day 1,7,14 after treatment. (n=3).
